# Supplementary material for: Smartphone apps for depression and anxiety: a systematic review and meta-analysis of techniques to increase engagement
Source: PubMed Central journal article supplement (PMC7878769; doi:10.1038/s41746-021-00386-8), 2021-02-11
Supplement: 41746_2021_386_MOESM1_ESM.pdf [file 41746_2021_386_MOESM1_ESM.pdf]

## Supplementary Information

### **Supplementary Note 1: Analyses When Removing Outliers and Risk of Bias Subgroup Analyses**

#### **Meta-analysis of effect of smartphone apps on depressive or anxiety symptoms**

Four outliers were identified for the pre/post meta-analysis, and upon exclusion of outliers, the effect size remained significant, and heterogeneity remained similar ( $g=0.6021$ ,  $SE=-0.0775$ ,  $t(21)=7.7650$ ,  $p<0.0001$ ,  $Q(df=20)=71.1345$ ,  $p<0.0001$ ,  $I^2=85.13\%$ ). Looking at just randomized controlled trials, one outlier was identified. When the outlier was removed, the effect size remained significant, and heterogeneity remained similar ( $g=0.2434$ ,  $SE=0.1661$ ,  $z(14)=3.17$ ,  $p=0.0074$ ,  $Q(df=13)=34.25$ ,  $p=0.0011$ ,  $I^2=62.0\%$ ). No subgroup differences in efficacy were detected when the studies were stratified by risk of bias score ( $Q(df=1)=1.45$ ,  $p=0.2284$ ).

#### **Meta-regression PSD features and efficacy**

When the one outlier was removed, the findings were similar for both PSD features ( $\beta=0.0420$ ,  $SE=0.0111$ ,  $t(14)=3.8010$ ,  $p=0.0022$ ) and PSD categories ( $\beta=0.1157$ ,  $SE=0.0210$ ,  $t(14)=5.4966$ ,  $p=0.0001$ ).

#### **Meta-analysis of study completion rate**

One outlier was identified. When the outlier was removed, the effect size remained non-significant, and heterogeneity decreased ( $g=0.9209$ ,  $SE=0.0993$ ,  $z(16)=-1.54$ ,  $p=0.1441$ ,  $Q(df=13)=21.52$ ,  $p=0.1211$ ,  $I^2=30.3\%$ ). No subgroup differences in efficacy were detected when the studies were stratified by risk of bias score ( $Q(df=1)=0.46$ ,  $p=0.4991$ ).

#### **Meta-regression of PSD features and study completion rate**

When the one outlier was removed, the findings were similar for PSD features ( $\beta=-0.0207$ ,  $SE=0.0081$ ,  $t(16)=-2.5424$ ,  $p=0.0225$ ) and PSD categories ( $\beta=-0.0627$ ,  $SE=0.0191$ ,  $t(16)=-3.2871$ ,  $p=0.0050$ ).

**Supplementary Table 1. Persuasive System Design (PSD) Categories and Features**

| Principle and definition according to PSD framework |                                                                                                                                                                                        | Coded as element included when the web-based intervention:                                                                                                   | Example                                                                                                                                                                                                   |
|-----------------------------------------------------|----------------------------------------------------------------------------------------------------------------------------------------------------------------------------------------|--------------------------------------------------------------------------------------------------------------------------------------------------------------|-----------------------------------------------------------------------------------------------------------------------------------------------------------------------------------------------------------|
| <b>Primary Task Support</b>                         |                                                                                                                                                                                        |                                                                                                                                                              |                                                                                                                                                                                                           |
| Reduction                                           | A system that reduces complex behavior into simple tasks helps users perform the target behavior, and it may increase the benefit/cost ratio of a behavior.                            | Specifically divides the target behavior into small, simple steps                                                                                            | An app-based intervention for social anxiety includes a diary for recording daily mood, thereby dividing the target behavior (decreasing anxiety) into small, simple steps of which one is tracking moods |
| Tunneling                                           | Using the system to guide users through a process or experience provides opportunities to persuade along the way.                                                                      | Delivers content in a step-by-step format with a predefined order                                                                                            | An app for the prevention of depression that delivers the content in sequential lessons that can only be accessed when the previous lesson is completed                                                   |
| Tailoring                                           | Information provided by the system will be more persuasive if it is tailored to the potential needs, interests, personality, usage context, or other factors relevant to a user group. | Provides content that is adapted to factors relevant to a user group, or when a counselor provides feedback based on information filled out by a participant | An app for treating depression anxiety provides information adapted to patients based on whether they are most concerned about anxiety or depression.                                                     |
| Personalization                                     | A system that offers personalized content or services has a greater capability for persuasion.                                                                                         | Provides content that is adapted to one user (ie, the name of the user is mentioned and/or the user can adapt a part of the intervention)                    | An app allows users to choose whether they want to see their weekly mood scores on the home page or not                                                                                                   |
| Self-monitoring                                     | A system that keeps track of one's own performance or status supports the user in achieving goals.                                                                                     | Provides the ability to track and view the user's behavior, performance or status                                                                            | An app allows users to track their symptoms, mood, or behaviors.                                                                                                                                          |

|                         |                                                                                                                                       |                                                                                                                            |                                                                                                                                  |
|-------------------------|---------------------------------------------------------------------------------------------------------------------------------------|----------------------------------------------------------------------------------------------------------------------------|----------------------------------------------------------------------------------------------------------------------------------|
| Simulation              | Systems that provide simulations can persuade by enabling users to observe immediately the link between cause and effect.             | Provides the ability to observe the cause-and-effect relationship of relevant behavior                                     | An app includes a before-and-after comparison of a patient who has completed the app treatment.                                  |
| Rehearsal               | A system providing means with which to rehearse a behavior can enable people to change their attitudes or behavior in the real world. | Provides the ability and stimulation to rehearse a behavior or to rehearse the content of the intervention                 | An app for anxiety starts each lesson with the same meditation.                                                                  |
| <b>Dialogue Support</b> |                                                                                                                                       |                                                                                                                            |                                                                                                                                  |
| Praise                  | By offering praise, a system can make users more open to persuasion.                                                                  | Offers praise to the participant on any occasion                                                                           | A cognitive behavioral therapy-based app compliments users for completing a homework assignment.                                 |
| Rewards                 | Systems that reward target behaviors may have great persuasive powers.                                                                | Offers some kind of reward when the participant performs a target behavior relating to the use or goal of the intervention | A web-based intervention for the treatment of social anxiety gives points to participants when they engage in exposure exercises |
| Reminders               | If a system reminds users of their target behavior, the users will more likely achieve their goals.                                   | Provides reminders about the use of the intervention or the performance of target behavior                                 | An app sends an automatic push notifications to remind the participant to log their mood that day.                               |
| Suggestion              | Systems offering fitting suggestions will have greater persuasive powers.                                                             | Provides a suggestion to help the participants reach the target behavior                                                   | An app suggests exercises to improve the user's mood.                                                                            |
| Similarity              | People are more readily persuaded through systems that remind them of themselves in some meaningful way.                              | Is designed to look familiar and designed especially for the participant                                                   | An app for adolescents with anxiety explains the exercises through a teenager with anxiety.                                      |

|                       |                                                                                                                                                  |                                                                                                                                                 |                                                                                                                                                                                                  |
|-----------------------|--------------------------------------------------------------------------------------------------------------------------------------------------|-------------------------------------------------------------------------------------------------------------------------------------------------|--------------------------------------------------------------------------------------------------------------------------------------------------------------------------------------------------|
| Liking                | A system that is visually attractive for its users is likely to be more persuasive.                                                              | Is visually designed to be attractive to the participants                                                                                       | During the design of an app for patients with depression, a representative group is asked for feedback on the design and their feedback is subsequently incorporated in the new design           |
| Social role           | If a system adopts a social role, users will more likely use it for persuasive purposes.                                                         | Acts as if it has a social role (eg, a coach, instructor, or buddy)                                                                             | An app incorporates an avatar to guide the participant through the intervention                                                                                                                  |
| <b>Social Support</b> |                                                                                                                                                  |                                                                                                                                                 |                                                                                                                                                                                                  |
| Social learning       | A person will be more motivated to perform a target behavior if (s)he can use a system to observe others performing the behavior.                | Provides the opportunity and stimulates participants to see others using the intervention or performing the target behavior                     | An app for depression provides the option, and stresses the importance, of posting cognitive restructuring exercises on the discussion board and commenting on the exercises of others.          |
| Social comparison     | System users will have a greater motivation to perform the target behavior if they can compare their performance with the performance of others. | Provides the opportunity for participants to compare their behavior to the target behavior of other participants and stimulates them to do this | An app automatically compares the response of the participant to other users of the intervention                                                                                                 |
| Normative influence   | A system can leverage normative influence or peer pressure to increase the likelihood that a person will adopt a target behavior.                | Provides normative information on the target behavior or the usage of the intervention                                                          | A meditation app for patients with anxiety provides feedback on the amount of meditation the participant completed by comparing it to the meditations completed by well-managed anxiety patients |

|                            |                                                                                                                                                   |                                                                                             |                                                                                                                                                                      |
|----------------------------|---------------------------------------------------------------------------------------------------------------------------------------------------|---------------------------------------------------------------------------------------------|----------------------------------------------------------------------------------------------------------------------------------------------------------------------|
| Social facilitation        | System users are more likely to perform target behavior if they discern via the system that others are performing the behavior along with them.   | Provides the opportunity to see whether there are other participants using the intervention | An app for depression includes a discussion board for users of the intervention                                                                                      |
| Cooperation                | A system can motivate users to adopt a target attitude or behavior by leveraging human beings' natural drive to cooperate.                        | Stimulates participants to cooperate to achieve a target behavior                           | A cognitive behavioral therapy-based app stimulates participants to form groups and to achieve the group goal of a certain number of homework assignments each week. |
| Competition                | A system can motivate users to adopt a target attitude or behavior by leveraging human beings' natural drive to compete.                          | Stimulates participants to compete with each other to achieve a target behavior             | A meditation app includes a leaderboard in which the users who meditate on the most days earn the highest place                                                      |
| Recognition                | By offering public recognition for an individual or group, a system can increase the likelihood that a person/group will adopt a target behavior. | Prominently shows (former) participants who adopted the target behavior                     | An app that treats anxiety includes a testimonial page where successful users of the intervention tell their story                                                   |
| <b>Credibility Support</b> |                                                                                                                                                   |                                                                                             |                                                                                                                                                                      |
| Trustworthiness            | A system that is viewed as trustworthy will have increased powers of persuasion.                                                                  | System should provide information that is truthful, fair and unbiased.                      | An app website or App Store profile provides information about the app rather than simply providing biased advertising or marketing information.                     |
| Expertise                  | A system that is viewed as incorporating expertise will have increased powers of persuasion.                                                      | System should provide information showing knowledge, experience, and competence.            | An app provides information about their core knowledge base and is updated regularly, with no incomplete or out-of-date information.                                 |

|                          |                                                                                                                                |                                                                                                             |                                                                                                                                               |
|--------------------------|--------------------------------------------------------------------------------------------------------------------------------|-------------------------------------------------------------------------------------------------------------|-----------------------------------------------------------------------------------------------------------------------------------------------|
| Surface credibility      | People make initial assessments of the system credibility based on a firsthand inspection.                                     | System should have a competent look and feel.                                                               | There are only a limited number of, and a logical reason for, ads on a mobile application.                                                    |
| Real-world feel          | A system that highlights people or organization behind its content or services will have more credibility                      | System should provide information of the organization and/or actual people behind its content and services. | An app provides possibilities to contact specific people through sending feedback or asking questions.                                        |
| Authority                | A system that leverages roles of authority will have enhanced powers of persuasion.                                            | System should refer to people in the role of authority.                                                     | App quotes an authority, such as a statement by government health office or expert in the field.                                              |
| Third-party endorsements | Third-party endorsements, especially from well-known and respected sources, boost perceptions on system credibility.           | System should provide endorsements from respected sources.                                                  | An app shows a logo of a certificate that assures that they use secure connections. An app refers to an award it received for high usability. |
| Verifiability            | Credibility perceptions will be enhanced if a system makes it easy to verify the accuracy of site content via outside sources. | System should provide means to verify the accuracy of site content via outside sources.                     | Information provided in the app is supported by offering links to other resources such as websites or research articles.                      |

**Supplement Table 2. Behavioral Economics (BE) Categories and Features**

| Principle and definition according to BE |                                                                                                                           | Description in the context of app-based interventions                                                                                                                   | Example                                                                                                                                               |
|------------------------------------------|---------------------------------------------------------------------------------------------------------------------------|-------------------------------------------------------------------------------------------------------------------------------------------------------------------------|-------------------------------------------------------------------------------------------------------------------------------------------------------|
| Loss Aversion                            | A person is more motivated to prevent a loss than to secure a gain of the same amount. Uses prospect theory <sup>68</sup> | Participant receives something at the beginning of a time period and is encouraged to engage in behaviors to prevent losing that entity                                 | At the beginning of the study, the participant receives 100 points and loses 10 points for each day they do not track their mood                      |
| Fresh Start Effect                       | Temporal landmarks motivate aspirational behavior <sup>11</sup>                                                           | Temporal landmarks are demarcated by the app (e.g. start of the week, month, or year), and progress is tracked only in the temporal periods demarcated by the landmarks | Every month, the participant's points or levels reset                                                                                                 |
| Pre-Commitment Pledge                    | Setting a goal beforehand has been shown to motivate behavior change <sup>12</sup>                                        | Asks the participant to set a goal before starting the intervention                                                                                                     | The participant pledges to achieve 1 exposure/week during the intervention before starting the intervention                                           |
| Lottery                                  | A person is selected at random to receive a prize as a way to motivate the target behavior <sup>13</sup>                  | Has at least one lottery for which one participant is selected at random to receive a prize                                                                             | Every participant that tracks their mood at least once during the week is entered into a lottery at the end of the week, and the winner receives \$10 |

**Supplementary Table 3. Control Conditions for RCTs**

| <b>First Author</b>             | <b>Publication Year</b> | <b>Name of App</b>                               | <b>Control Arm</b>                     |
|---------------------------------|-------------------------|--------------------------------------------------|----------------------------------------|
| Ben-Zeev <sup>22</sup>          | 2019                    | FOCUS                                            | Clinic-based group intervention        |
| Dahne 1 <sup>27</sup>           | 2019                    | Aptivate                                         | iCouch CBT app; TAU                    |
| Dahne 2 <sup>26</sup>           | 2019                    | Moodivate                                        | MoodKit app; TAU                       |
| Enock <sup>28</sup>             | 2014                    | Cognitive bias modification of attention (CBM-A) | Placebo CBM-A app; Waitlist            |
| Hur <sup>29</sup>               | 2018                    | Todac Todac                                      | Daily mood chart app                   |
| Ludtke <sup>31</sup>            | 2018                    | Be Good to Yourself                              | Waitlist                               |
| Lukas <sup>32</sup>             | 2019                    | MTPhoenix                                        | Waitlist                               |
| Ly <sup>33</sup>                | 2014                    | Behavioral Activation (BA) intervention          | Mindfulness app                        |
| Moberg <sup>35</sup>            | 2019                    | Pacifica                                         | Waitlist                               |
| Mohr <sup>36</sup>              | 2019                    | IntelliCare                                      | Coach, with or without recommendations |
| Roepke A1 <sup>39</sup>         | 2015                    | CBT-PPT SuperBetter                              | Waitlist                               |
| Roepke A2 <sup>39</sup>         | 2015                    | General SuperBetter                              | Waitlist                               |
| Stiles-Shields A1 <sup>40</sup> | 2019                    | Boost Me                                         | Waitlist                               |
| Stiles-Shields A2 <sup>40</sup> | 2019                    | Thought Challenger                               | Waitlist                               |
| Stolz <sup>41</sup>             | 2018                    | iCBT                                             | PC iCBT; Waitlist                      |



**Supplementary Table 4. Treatment of Missing Data in Efficacy Analyses**

| <b>First Author</b>     | <b>How efficacy was computed in the case of drop-out</b>                                                                                                                                                                                                                                                                                                                                                                                                                                                                                                                                                                                                  |
|-------------------------|-----------------------------------------------------------------------------------------------------------------------------------------------------------------------------------------------------------------------------------------------------------------------------------------------------------------------------------------------------------------------------------------------------------------------------------------------------------------------------------------------------------------------------------------------------------------------------------------------------------------------------------------------------------|
| Anguera <sup>20</sup>   | N/A; Clinical outcomes not reported                                                                                                                                                                                                                                                                                                                                                                                                                                                                                                                                                                                                                       |
| Bakker <sup>21</sup>    | Removal of missing cases                                                                                                                                                                                                                                                                                                                                                                                                                                                                                                                                                                                                                                  |
| Ben-Zeev <sup>22</sup>  | ITT analyses using mixed-effects models                                                                                                                                                                                                                                                                                                                                                                                                                                                                                                                                                                                                                   |
| Bustillos <sup>23</sup> | Removal of missing cases                                                                                                                                                                                                                                                                                                                                                                                                                                                                                                                                                                                                                                  |
| Caplan <sup>24</sup>    | N/A; Clinical outcomes not reported                                                                                                                                                                                                                                                                                                                                                                                                                                                                                                                                                                                                                       |
| Chen <sup>25</sup>      | Removal of missing cases                                                                                                                                                                                                                                                                                                                                                                                                                                                                                                                                                                                                                                  |
| Dahne <sup>1 27</sup>   | Participants with at least one follow-up assessment were included in generalized estimating equations                                                                                                                                                                                                                                                                                                                                                                                                                                                                                                                                                     |
| Dahne <sup>2 26</sup>   | Participants with at least one follow-up assessment were included in generalized estimating equations                                                                                                                                                                                                                                                                                                                                                                                                                                                                                                                                                     |
| Enock <sup>28</sup>     | ITT analyses with last observation carried forward                                                                                                                                                                                                                                                                                                                                                                                                                                                                                                                                                                                                        |
| Hur <sup>29</sup>       | Removal of missing cases                                                                                                                                                                                                                                                                                                                                                                                                                                                                                                                                                                                                                                  |
| Inkster <sup>30</sup>   | N/A; Only app users who completed both assessments were included in sample                                                                                                                                                                                                                                                                                                                                                                                                                                                                                                                                                                                |
| Lim <sup>44</sup>       | Removal of missing cases                                                                                                                                                                                                                                                                                                                                                                                                                                                                                                                                                                                                                                  |
| Ludtke <sup>31</sup>    | ITT analyses using multiple imputation (method of imputation was “fully conditional specification,” an iterative Markov chain Monte Carlo method, set as default by SPSS version 24)                                                                                                                                                                                                                                                                                                                                                                                                                                                                      |
| Lukas <sup>32</sup>     | ITT analyses using multiple imputation (method of imputation was the Markov Chain Monte Carlo multivariate imputation algorithm with ten estimations per missing value)                                                                                                                                                                                                                                                                                                                                                                                                                                                                                   |
| Ly <sup>33</sup>        | ITT analyses using mixed effects models. All analyses used maximum likelihood estimation.                                                                                                                                                                                                                                                                                                                                                                                                                                                                                                                                                                 |
| Mehrotra <sup>34</sup>  | Removal of missing cases                                                                                                                                                                                                                                                                                                                                                                                                                                                                                                                                                                                                                                  |
| Moberg <sup>35</sup>    | ITT analysis using multilevel modeling                                                                                                                                                                                                                                                                                                                                                                                                                                                                                                                                                                                                                    |
| Mohr <sup>36</sup>      | Modified ITT analysis with unadjusted outcomes using generalized linear mixed models, assuming a heterogeneous unstructured covariance structure by randomization strata. Secondary analysis used the expectation-maximization algorithm to impute 5 distinct datasets, in which 4-week outcomes were imputed for any participant who did not have at least one follow-up assessment, allowing all participants to be included in generalized linear mixed models. Parameter estimates and standard errors from each of the 5 models were combined and included in the SAS MIANALYZE procedure to derive valid inferences for the parameters of interest. |
| Norton <sup>37</sup>    | Removal of missing cases                                                                                                                                                                                                                                                                                                                                                                                                                                                                                                                                                                                                                                  |
| Pratap <sup>38</sup>    | Generalized estimating equations that account for within-subject correlations of participant responses                                                                                                                                                                                                                                                                                                                                                                                                                                                                                                                                                    |
| Roepke <sup>39</sup>    | ITT analyses estimated with the maximum likelihood method in a hierarchical linear modeling framework                                                                                                                                                                                                                                                                                                                                                                                                                                                                                                                                                     |

|                              |                                                                                                                                                                                                                                                                                                                                    |
|------------------------------|------------------------------------------------------------------------------------------------------------------------------------------------------------------------------------------------------------------------------------------------------------------------------------------------------------------------------------|
| Stiles-Shields <sup>40</sup> | Removal of missing cases                                                                                                                                                                                                                                                                                                           |
| Stolz <sup>41</sup>          | ITT analyses. Mixed-effect models using unstructured covariance matrices and restricted maximum likelihood estimation with time-points nested within subjects. Analyses were repeated using multiple imputation and repeated-measures ANOVA with time as a within-group factor and treatment condition as a between-groups factor. |
| Wahle <sup>42</sup>          | Removal of missing cases                                                                                                                                                                                                                                                                                                           |
| Watts <sup>43</sup>          | Linear mixed-model repeated measures ANOVA with measurement occasion as a within-group factor and intervention as a between-groups factor. Analyses conducted using the MIXED procedure in SPSS Version 19 with an identity covariance matrix.                                                                                     |

**Supplementary Table 5. App Content**

| App                                                | Psych<br>o-<br>educat<br>ion | Cognit<br>ive<br>Techni<br>ques | Behavi<br>oral<br>Techni<br>ques | Mindfu<br>lness | Relaxa<br>tion | Mood<br>Expres<br>sion | Tracki<br>ng<br>Thoug<br>hts | Tracki<br>ng<br>Moods | Tracki<br>ng<br>Behavi<br>or | Tracki<br>ng<br>Sympt<br>oms | Tracki<br>ng<br>physio<br>param<br>eters |
|----------------------------------------------------|------------------------------|---------------------------------|----------------------------------|-----------------|----------------|------------------------|------------------------------|-----------------------|------------------------------|------------------------------|------------------------------------------|
| <b>Aptivate</b> <sup>27</sup>                      | X                            |                                 | X                                |                 |                |                        |                              | X                     | X                            |                              |                                          |
| <b>BA<br/>Intervention</b><br><small>33</small>    | X                            |                                 | X                                |                 |                |                        |                              |                       | X                            |                              |                                          |
| <b>Be Good to<br/>Yourself</b> <sup>31</sup>       | X                            | X                               | X                                | X               |                |                        |                              |                       |                              |                              |                                          |
| <b>Boost Me</b> <sup>40</sup>                      |                              |                                 | X                                |                 |                |                        |                              | X                     | X                            |                              |                                          |
| <b>Calm</b> <sup>37</sup>                          | X                            |                                 |                                  | X               | X              |                        |                              |                       |                              |                              |                                          |
| <b>CBMA</b> <sup>28</sup>                          |                              | X                               |                                  |                 |                |                        |                              |                       |                              |                              |                                          |
| <b>CBMA<br/>Control</b> <sup>28</sup>              |                              | Placeb<br>o                     |                                  |                 |                |                        |                              |                       |                              |                              |                                          |
| <b>El Buen<br/>Consejo<br/>Movil</b> <sup>24</sup> | X                            | X                               | X                                |                 |                |                        | X                            | X                     |                              |                              |                                          |
| <b>EVO</b> <sup>20,38</sup>                        |                              | Video<br>game                   |                                  |                 |                |                        |                              |                       |                              |                              |                                          |
| <b>FOCUS</b> <sup>22</sup>                         | X                            | X                               | X                                |                 | X              |                        |                              | X                     |                              |                              |                                          |
| <b>Get Happy<br/>Program</b> <sup>43</sup>         | X                            | X                               | X                                |                 |                |                        |                              |                       |                              |                              |                                          |
| <b>Health<br/>Tips</b> <sup>20,38</sup>            | X                            |                                 | X                                |                 |                |                        |                              |                       |                              |                              |                                          |
| <b>iCBT</b> <sup>41</sup>                          | X                            | X                               | X                                |                 | X              |                        | X                            |                       | X                            |                              |                                          |
| <b>iCouch<br/>CBT</b> <sup>27</sup>                |                              | X                               | X                                |                 |                |                        |                              |                       |                              |                              |                                          |
| <b>Intellicare</b> <sup>25,36</sup>                | X                            | X                               | X                                | X               | X              |                        |                              | X                     | X                            |                              | X                                        |

|                                          |          |          |          |          |   |   |   |   |   |   |          |
|------------------------------------------|----------|----------|----------|----------|---|---|---|---|---|---|----------|
| Mindfulness App <sup>33</sup>            | X        |          |          | <b>X</b> |   |   |   |   |   |   |          |
| Mobile Sensing and Support <sup>42</sup> | X        | X        | <b>X</b> | X        | X |   |   |   | X |   | <b>X</b> |
| Moodivate <sup>26</sup>                  | X        |          | <b>X</b> |          |   |   |   | X | X |   |          |
| MoodKit <sup>26</sup>                    |          | <b>X</b> | <b>X</b> |          |   | X | X | X | X | X |          |
| MoodMission <sup>21</sup>                | X        | <b>X</b> | <b>X</b> |          |   |   | X | X | X | X |          |
| MT-Phoenix <sup>32</sup>                 | X        | <b>X</b> | X        |          | X |   |   |   |   |   |          |
| Pacifica <sup>23,35</sup>                | X        | X        | X        | X        | X |   | X | X | X |   | X        |
| Plus Connect <sup>44</sup>               | X        | X        | X        |          |   |   |   | X |   |   |          |
| PUSH-D <sup>34</sup>                     | <b>X</b> | <b>X</b> | <b>X</b> |          | X |   |   | X | X |   |          |
| Superbetter CBT <sup>39</sup>            | X        | X        | X        | X        |   |   |   |   | X |   |          |
| Superbetter General <sup>39</sup>        | X        | X        | X        | X        |   |   |   |   | X |   |          |
| Thought Challenger <sup>41</sup>         |          | <b>X</b> |          |          |   |   | X |   |   |   |          |
| Todac Todac <sup>29</sup>                |          | <b>X</b> |          |          |   |   |   |   |   |   |          |
| Wysa <sup>30</sup>                       |          | <b>X</b> | <b>X</b> | <b>X</b> | X |   |   |   |   |   |          |

\*Bolded "X"s indicated an app's primary content.

**Supplementary Table 6. App Usability Features**

| App                                      | Safety features        |                              |                                  | Privacy features |                                                                                                |                        |
|------------------------------------------|------------------------|------------------------------|----------------------------------|------------------|------------------------------------------------------------------------------------------------|------------------------|
|                                          | Suicidality assessment | Suicidality resources in app | Safety monitoring by study staff | Privacy policy   | Information covered by privacy policy                                                          | Other privacy features |
| Aptivate <sup>27</sup>                   |                        |                              |                                  |                  |                                                                                                |                        |
| BA Intervention <sup>33</sup>            |                        |                              | X                                |                  |                                                                                                | Encryption             |
| Be Good to Yourself <sup>31</sup>        |                        |                              |                                  |                  |                                                                                                |                        |
| Boost Me <sup>40</sup>                   | X                      | X                            | X                                |                  |                                                                                                |                        |
| Calm <sup>37</sup>                       |                        |                              |                                  | X*               | Type of information collected, Rationale for collecting, Sharing of information, User controls | Password               |
| CBMA <sup>28</sup>                       |                        |                              |                                  |                  |                                                                                                |                        |
| CBMA Control <sup>28</sup>               |                        |                              |                                  |                  |                                                                                                |                        |
| El Buen Consejo Movil <sup>24</sup>      |                        |                              | X                                |                  |                                                                                                | Username               |
| EVO <sup>20,38</sup>                     |                        |                              |                                  |                  |                                                                                                |                        |
| FOCUS <sup>22</sup>                      |                        |                              | X                                |                  |                                                                                                |                        |
| Get Happy Program <sup>43</sup>          |                        |                              |                                  |                  |                                                                                                |                        |
| Health Tips <sup>20,38</sup>             |                        |                              |                                  |                  |                                                                                                | Encryption             |
| iCBT <sup>41</sup>                       |                        |                              |                                  |                  |                                                                                                |                        |
| iCouch CBT <sup>27</sup>                 | X                      |                              |                                  | X*               | Type of information collected, Rationale for collecting, Sharing of information, User controls |                        |
| Intellicare <sup>25,36</sup>             |                        |                              | X                                |                  |                                                                                                |                        |
| Mindfulness App <sup>33</sup>            |                        |                              |                                  |                  |                                                                                                |                        |
| Mobile Sensing and Support <sup>42</sup> |                        | X                            |                                  |                  |                                                                                                | Encryption             |
| Moodivate <sup>26</sup>                  |                        |                              |                                  | X*               | User controls                                                                                  |                        |

|                                          |   |   |   |    |                                                                                                |                      |
|------------------------------------------|---|---|---|----|------------------------------------------------------------------------------------------------|----------------------|
| <b>MoodKit</b> <sup>26</sup>             |   |   |   | X* | Type of information collected, Rationale for collecting, Sharing of information, User controls | Password             |
| <b>MoodMission</b> <sup>21</sup>         |   |   |   | X* | Type of information collected, Rationale for collecting, Sharing of information                |                      |
| <b>MT-Phoenix</b> <sup>32</sup>          |   |   |   |    |                                                                                                |                      |
| <b>Pacifica</b> <sup>23,35</sup>         |   | X |   | X  | Type of information collected, Rationale for collecting, Sharing of information, User controls |                      |
| <b>Plus Connect</b> <sup>44</sup>        |   |   | X |    |                                                                                                |                      |
| <b>PUSH-D</b> <sup>34</sup>              | X | X |   |    |                                                                                                | Encryption, Password |
| <b>Superbetter CBT</b> <sup>39</sup>     |   |   |   |    |                                                                                                |                      |
| <b>Superbetter General</b> <sup>39</sup> |   |   |   |    |                                                                                                |                      |
| <b>Thought Challenger</b> <sup>41</sup>  | X | X | X |    |                                                                                                |                      |
| <b>Todac Todac</b> <sup>29</sup>         |   |   |   |    |                                                                                                |                      |
| <b>Wysa</b> <sup>30</sup>                |   |   |   | X  | Sharing of information, information type collected, reason for collection, user controls       |                      |

\*Available on website or app profile, external to research publication.

**Supplementary Table 7. App Accessibility**

| <b>App</b>                                      | <b>Accessibility</b> | <b>Availability</b>             | <b>Cost</b>            |
|-------------------------------------------------|----------------------|---------------------------------|------------------------|
| <b>Aptivate</b> <sup>27</sup>                   | Public               | Apple App Store                 | \$4.99                 |
| <b>BA Intervention</b> <sup>33</sup>            | Research only        |                                 | Free                   |
| <b>Be Good to Yourself</b> <sup>31</sup>        | Unclear              |                                 | Free                   |
| <b>Boost Me</b> <sup>40</sup>                   | Public               | Google Play                     | Free                   |
| <b>Calm</b> <sup>37</sup>                       | Public               | Apple App Store,<br>Google Play | Unclear                |
| <b>CBMA</b> <sup>28</sup>                       | Research only        |                                 | Free                   |
| <b>CBMA Control</b> <sup>28</sup>               | Research only        |                                 | Free                   |
| <b>El Buen Consejo Movil</b> <sup>24</sup>      | Research only        |                                 | Free                   |
| <b>EVO</b> <sup>20,38</sup>                     | Research only        |                                 | Free                   |
| <b>FOCUS</b> <sup>22</sup>                      | Unclear              |                                 | Free                   |
| <b>Get Happy Program</b> <sup>43</sup>          | Research only        |                                 | Free                   |
| <b>Health Tips</b> <sup>20,38</sup>             | Research only        |                                 | Free                   |
| <b>iCBT</b> <sup>41</sup>                       | Research only        |                                 | Free                   |
| <b>iCouch CBT</b> <sup>27</sup>                 | Public               | Apple App Store                 | \$2.99                 |
| <b>Intellicare</b> <sup>25,36</sup>             | Public               | Google Play                     | Free                   |
| <b>Mindfulness App</b> <sup>33</sup>            | Public               | Apple App Store                 | Unclear                |
| <b>Mobile Sensing and Support</b> <sup>42</sup> | Unclear              | Google Play                     | Unclear                |
| <b>Moodivate</b> <sup>26</sup>                  | Public               | Apple App Store                 | \$4.99                 |
| <b>MoodKit</b> <sup>26</sup>                    | Public               | Apple App Store                 | \$4.99                 |
| <b>MoodMission</b> <sup>21</sup>                | Public               | Apple App Store,<br>Google Play | Free                   |
| <b>MT-Phoenix</b> <sup>32</sup>                 | Unclear              | Apple App Store                 | Free                   |
| <b>Pacifica</b> <sup>23,35</sup>                | Public               | Apple App Store,<br>Google Play | Free for basic version |
| <b>Plus Connect</b> <sup>44</sup>               | Unclear              |                                 | Free                   |
| <b>PUSH-D</b> <sup>34</sup>                     | Unclear              | Google Play                     | Free                   |

|                                          |         |             |                        |
|------------------------------------------|---------|-------------|------------------------|
| <b>Superbetter CBT</b> <sup>39</sup>     | Unclear |             | Unclear                |
| <b>Superbetter General</b> <sup>39</sup> | Unclear |             | Unclear                |
| <b>Thought Challenger</b> <sup>41</sup>  | Public  | Google Play | Free                   |
| <b>Todac Todac</b> <sup>29</sup>         | Unclear |             | Unclear                |
| <b>Wysa</b> <sup>30</sup>                | Public  | Google Play | Free for basic version |



**Supplementary Table 8. Behavioral Economics Features**

| App                                             | Loss Aversion | Fresh Start Effect | Pre-Commitment Pledge | Lottery |
|-------------------------------------------------|---------------|--------------------|-----------------------|---------|
| <b>Aptivate</b> <sup>27</sup>                   |               |                    |                       |         |
| <b>BA Intervention</b> <sup>33</sup>            |               |                    |                       |         |
| <b>Be Good to Yourself</b> <sup>31</sup>        |               |                    |                       |         |
| <b>Boost Me</b> <sup>40</sup>                   |               |                    |                       |         |
| <b>Calm</b> <sup>37</sup>                       |               |                    |                       |         |
| <b>CBMA</b> <sup>28</sup>                       |               |                    |                       |         |
| <b>CBMA Control</b> <sup>28</sup>               |               |                    |                       |         |
| <b>El Buen Consejo Movil</b> <sup>24</sup>      |               |                    |                       |         |
| <b>EVO</b> <sup>20,38</sup>                     |               |                    |                       |         |
| <b>FOCUS</b> <sup>22</sup>                      |               |                    |                       |         |
| <b>Get Happy Program</b> <sup>43</sup>          |               |                    |                       |         |
| <b>Health Tips</b> <sup>20,38</sup>             |               |                    |                       |         |
| <b>iCBT</b> <sup>41</sup>                       |               |                    | X                     |         |
| <b>iCouch CBT</b> <sup>27</sup>                 |               |                    |                       |         |
| <b>Intellicare</b> <sup>25,36</sup>             | X             |                    |                       |         |
| <b>Mindfulness App</b> <sup>33</sup>            |               |                    |                       |         |
| <b>Mobile Sensing and Support</b> <sup>42</sup> |               |                    |                       |         |
| <b>Moodivate</b> <sup>26</sup>                  |               |                    |                       |         |
| <b>MoodKit</b> <sup>26</sup>                    |               |                    |                       |         |
| <b>MoodMission</b> <sup>21</sup>                |               |                    |                       |         |
| <b>MT-Phoenix</b> <sup>32</sup>                 |               |                    |                       |         |
| <b>Pacifica</b> <sup>23,35</sup>                |               |                    | X                     |         |
| <b>Plus Connect</b> <sup>44</sup>               |               |                    |                       |         |
| <b>PUSH-D</b> <sup>34</sup>                     |               |                    |                       |         |
| <b>Superbetter CBT</b> <sup>39</sup>            |               |                    | X                     |         |
| <b>Superbetter General</b> <sup>39</sup>        |               |                    | X                     |         |
| <b>Thought Challenger</b> <sup>41</sup>         |               |                    |                       |         |

|                                         |  |  |  |  |
|-----------------------------------------|--|--|--|--|
| <b>Todac</b> <b>Todac</b> <sup>29</sup> |  |  |  |  |
| <b>Wysa</b> <sup>30</sup>               |  |  |  |  |
